# Supplementary material
Source: MDPI journal article supplement (https://www.mdpi.com/2311-7524/8/7/586)
Supplement: s1 [file s1]

**Table S1.** Soil's elemental mineral composition.

|                         | Sample   | V1-2 | V1-3 | V1-4 | V1-5 | V2-1 | V2-2 | V2-3 | V3-1 | V3-2  | V3-3 | V4-1 | V4-2 | V4-3 | V4-4 | V5-1 | V5-2 | V5-3 | V5-4 | V6-1 | V6-2 | V6-3 | V7-1 | V7-2 | V7-3 |
|-------------------------|----------|------|------|------|------|------|------|------|------|-------|------|------|------|------|------|------|------|------|------|------|------|------|------|------|------|
| <b>Limestone tot</b>    | g/kg     | 262  | 280  | 243  | 162  | 497  | 669  | 580  | 262  | 323   | 375  | 649  | 738  | 729  | 522  | 459  | 455  | 418  | 370  | 531  | 804  | 555  | 395  | 448  | 368  |
| <b>Active limestone</b> | g/kg     | 10   | 27   | 25   | <10  | 12   | 18   | 20   | 17   | 27    | 27   | 23   | 35   | 33   | 13   | <10  | 12   | 12   | 10   | <10  | 16   | 44   | 38   | 42   | 36   |
| <b>Organic matter</b>   | g/kg     | 20   | 14   | 12   | 12   | 22   | 3    | 6    | 21   | 6     | 13   | 29   | 17   | 13   | 23   | 34   | 29   | 24   | 16   | 45   | 14   | 27   | 9    | 7    | 3    |
| <b>P assimilable</b>    | mg/kg    | 48   | 15   | 18   | 50   | 67   | 7    | 20   | 19   | 8     | 12   | 53   | 35   | 38   | 40   | 66   | 48   | 55   | 41   | 77   | 25   | 47   | 16   | 8    | 10   |
| <b>K exchangeable</b>   | mg/kg    | 105  | 82   | 118  | 142  | 126  | 73   | 90   | 130  | 61    | 96   | 99   | 60   | 60   | 107  | 231  | 154  | 169  | 159  | 242  | 72   | 163  | 122  | 99   | 85   |
| <b>Mg exchangeable</b>  | mg/kg    | 401  | 415  | 424  | 557  | 400  | 222  | 438  | 348  | 340   | 353  | 353  | 333  | 345  | 355  | 542  | 579  | 625  | 748  | 463  | 249  | 562  | 272  | 280  | 350  |
| <b>Ag tot</b>           | mg/kg    | 0.12 | 0.15 | 0.19 | 0.13 | 0.1  | 0.02 | 0.04 | 0.06 | 0.04  | 0.04 | 0.05 | 0.03 | 0.03 | 0.08 | 0.14 | 0.11 | 0.13 | 0.12 | 0.08 | 0.02 | 0.05 | 0.04 | 0.02 | 0.02 |
| <b>Ba tot</b>           | mg/kg    | 106  | 133  | 117  | 125  | 89.9 | 41.5 | 85.6 | 111  | 86.5  | 98.6 | 46.4 | 42.7 | 40.6 | 89.8 | 119  | 119  | 136  | 143  | 78.8 | 36.7 | 76.2 | 101  | 99.6 | 101  |
| <b>Be</b>               | mg/kg    | 1.04 | 1.24 | 1.48 | 1.17 | 0.77 | 0.42 | 0.71 | 0.99 | 0.96  | 0.8  | 0.32 | 0.27 | 0.26 | 0.6  | 0.7  | 0.72 | 0.81 | 0.89 | 0.66 | 0.26 | 0.57 | 0.79 | 0.82 | 0.93 |
| <b>B</b>                | mg/kg    | 33.4 | 48.8 | 56   | 33.6 | 27.9 | 18.3 | 28.1 | 38.4 | 42.7  | 32.1 | 10   | 8.6  | 7.69 | 11.6 | 16.5 | 16.6 | 17.8 | 16.4 | 22.7 | 9.6  | 20   | 27.9 | 30.9 | 34   |
| <b>Ca tot</b>           | g/Kg     | 58.9 | 68.2 | 57   | 34   | 97.6 | 144  | 113  | 61.1 | 80.9  | 96   | 138  | 155  | 148  | 105  | 89.8 | 95.9 | 83.3 | 79.7 | 111  | 157  | 128  | 102  | 131  | 87   |
| <b>CSC</b>              | meq/100g | 13.4 | 12.3 | 12.1 | 13.3 | 14.1 | 3.8  | 9.7  | 14   | 7.4   | 9    | 9.7  | 6.4  | 6.9  | 13.4 | 21.5 | 16.7 | 18.6 | 17   | 24.4 | 6    | 17.5 | 9.2  | 6.8  | 6.1  |
| <b>Ce tot</b>           | mg/kg    | 55.9 | 56.7 | 49.4 | 61.9 | 46.9 | 41.7 | 41.2 | 53.9 | 53.1  | 47.5 | 22.4 | 17.3 | 22.3 | 37.9 | 44.6 | 43.9 | 48.3 | 54.4 | 46.2 | 19.3 | 37.4 | 59.5 | 54.9 | 66   |
| <b>Fe assimilable</b>   | mg/kg    | 21.9 | 12.3 | 16.8 | 11.6 | 17.7 | 3.5  | 10.4 | 29.1 | 5.6   | 8.7  | 7.2  | 3.9  | 4.5  | 8.2  | 13.4 | 8.9  | 8.4  | 9.9  | 41.8 | 8.5  | 14.2 | 5.5  | 3.3  | 3.3  |
| <b>Fe tot</b>           | mg/kg    | 14   | 14.6 | 14.6 | 15.9 | 11.4 | 7.3  | 11   | 16   | 9.8   | 13.3 | 5.4  | 4.6  | 5.6  | 10.3 | 12.7 | 13.3 | 13.6 | 16.4 | 10.2 | 4.8  | 9.6  | 12.9 | 12   | 14   |
| <b>Ln tot</b>           | mg/kg    | 26.2 | 27   | 23.3 | 30.6 | 21.2 | 18.5 | 18.5 | 26.5 | 27    | 21   | 10.7 | 8.6  | 10.7 | 17.2 | 20.2 | 20.5 | 22.5 | 25.7 | 2.9  | 9    | 16.6 | 28.9 | 26.6 | 31.5 |
| <b>Mn assimilable</b>   | mg/kg    | 6.6  | 11.4 | 8.5  | 11.1 | 5.2  | 1.2  | 6.3  | 12.2 | 3.7   | 7.4  | 3.2  | 3.8  | 3.6  | 7    | 6.5  | 10.1 | 10.5 | 12.8 | 3.8  | 2.9  | 6.4  | 2.8  | 3.1  | 2.9  |
| <b>Mn</b>               | mg/kg    | 524  | 498  | 461  | 599  | 347  | 204  | 296  | 436  | 223   | 352  | 213  | 171  | 174  | 377  | 403  | 435  | 446  | 465  | 275  | 134  | 238  | 264  | 227  | 253  |
| <b>pH</b>               | KCl      | 7.4  | 7.5  | 7.6  | 7.5  | 7.4  | 8.2  | 7.8  | 7.5  | 7.9   | 7.7  | 7.7  | 8    | 8    | 7.7  | 7.3  | 7.4  | 7.4  | 7.4  | 7.2  | 7.9  | 7.5  | 7.7  | 7.8  | 7.9  |
| <b>Pb tot</b>           | mg/kg    | 56.6 | 40.3 | 33.1 | 39.5 | 19.4 | 2.8  | 7.9  | 24.9 | 25    | 17.7 | 11.7 | 6.8  | 6.6  | 19.7 | 32.6 | 16.8 | 17   | 16.5 | 25.4 | 4.1  | 18.2 | 11.5 | 7.2  | 9.5  |
| <b>Cu assimilable</b>   | mg/kg    | 157  | 12.3 | 12.2 | 15.8 | 321  | 1.4  | 16.2 | 95.3 | 3     | 27.1 | 91.7 | 6.9  | 16.4 | 131  | 265  | 12.3 | 12.5 | 8.8  | 362  | 2.2  | 4.3  | 152  | 4.5  | 11.9 |
| <b>Cu</b>               | mg/kg    | 458  | 36.1 | 29.9 | 44.4 | 517  | 5.7  | 32.5 | 172  | 14.2  | 60.7 | 146  | 16.6 | 32.7 | 216  | 459  | 39.4 | 40.6 | 32.6 | 581  | 6.8  | 14.3 | 220  | 12.4 | 22.6 |
| <b>Rb</b>               | mg/kg    | 51.1 | 62.2 | 71.5 | 61.2 | 45.6 | 18.6 | 39.3 | 49.9 | 41.6  | 41.3 | 9.7  | 17.1 | 17.5 | 35.6 | 48.2 | 47   | 52.9 | 56.3 | 41.1 | 15   | 34.4 | 40.2 | 41   | 44.2 |
| <b>Na tot</b>           | mg/kg    | 186  | 253  | 172  | 172  | 224  | 185  | 210  | 195  | 142   | 216  | 132  | 132  | 121  | 159  | 206  | 212  | 220  | 217  | 163  | 130  | 186  | 222  | 243  | 237  |
| <b>Sr tot</b>           | mg/kg    | 100  | 139  | 142  | 85.6 | 123  | 124  | 138  | 107  | 101   | 109  | 75.4 | 80.1 | 76   | 72.2 | 93.4 | 91.4 | 91.8 | 81.7 | 186  | 163  | 235  | 318  | 346  | 373  |
| <b>Zn assimilable</b>   | mg/kg    | 7.5  | 3.2  | 5    | 2.1  | 12   | <0.5 | 1.1  | 6.5  | 1.4   | 2.3  | 5.4  | 0.8  | 1.3  | 9.8  | 16.1 | 2.9  | 3.2  | 2.3  | 22.6 | 0.9  | 1.6  | 2.3  | <0.5 | 0.5  |
| <b>Zn</b>               | mg/kg    | 75.1 | 61   | 63   | 56.9 | 61.5 | 17.8 | 38   | 85.4 | 102.8 | 69.1 | 28.2 | 14.2 | 15.5 | 58.1 | 90   | 62.9 | 66   | 68.7 | 82.4 | 20   | 34.6 | 41.6 | 37.6 | 44.8 |
| <b>S tot</b>            | mg/Kg    | 0.20 | 0.20 | 0.19 | 0.13 | 0.22 | 0.15 | 0.16 | 0.18 | 0.18  | 0.17 | 0.16 | 0.12 | 0.13 | 0.17 | 0.23 | 0.19 | 0.18 | 0.16 | 0.31 | 0.18 | 0.24 | 0.19 | 0.20 | 0.18 |

**Table S2.** Wines' targeted chemical-oenological analysis on, mineral elements' concentration values.

|                         | Vineyard |       |      |       |       |       |       |
|-------------------------|----------|-------|------|-------|-------|-------|-------|
|                         | 1        | 2     | 3    | 4     | 5     | 6     | 7     |
| <b>Silver (µg/l)</b>    | <0.01    | <0.01 | 0.01 | <0.01 | <0.01 | <0.01 | <0.01 |
| <b>Barium (µg/l)</b>    | 66.8     | 55.1  | 28.3 | 28.6  | 33.1  | 25.9  | 24.8  |
| <b>Beryllium (µg/l)</b> | 0.02     | 0.34  | 0.27 | 0.16  | 0.18  | 0.21  | 0.18  |
| <b>Boron (mg/l)</b>     | 5.43     | 4.84  | 4.9  | 4.37  | 4.86  | 4.3   | 5.2   |
| <b>Calcium (mg/l)</b>   | 45.7     | 68.4  | 53.6 | 45.8  | 50.9  | 55.7  | 61.8  |
| <b>Cerium (µg/l)</b>    | <0.3     | <0.3  | <0.3 | <0.3  | <0.3  | <0.3  | <0.3  |
| <b>Iron (mg/l)</b>      | 0.2      | 0.2   | 0.1  | 0.1   | 0.1   | 0.2   | 0.1   |
| <b>Lanthanum (µg/l)</b> | <0.3     | <0.3  | <0.3 | <0.3  | <0.3  | <0.3  | <0.3  |
| <b>Manganese (mg/l)</b> | 1.12     | 0.53  | 0.47 | 0.56  | 0.53  | 0.45  | 1.33  |
| <b>Lead (µg/l)</b>      | <16      | <16   | <16  | <16   | <16   | <16   | <16   |
| <b>Potassium (g/l)</b>  | 1.27     | 1.01  | 1.46 | 1.35  | 1.29  | 1.49  | 1.49  |
| <b>Copper (mg/l)</b>    | 0.1      | 0.05  | 0.14 | 0.15  | 0.09  | 0.15  | 0.25  |
| <b>Rubidium (µg/l)</b>  | 1.16     | 0.6   | 0.63 | 0.56  | 0.67  | 0.42  | 0.43  |
| <b>Sodium (mg/l)</b>    | 11.6     | 17.2  | 16.3 | 18.9  | 18.1  | 16.4  | 19.6  |
| <b>Strontium (µg/l)</b> | 0.1      | 0.13  | 0.08 | 0.16  | 0.14  | 0.15  | 0.2   |
| <b>Zinc (mg/l)</b>      | 0.5      | 0.43  | 0.45 | 0.45  | 0.45  | 0.46  | 0.81  |

**Table S3.** Amino acid amounts in grapes.

|              |         | Vineyard |       |       |       |       |       |       |
|--------------|---------|----------|-------|-------|-------|-------|-------|-------|
|              |         | V1       | V2    | V3    | V4    | V5    | V6    | V7    |
| L-ALANINE    | (mg/kg) | 248.7    | 59.1  | 68.1  | 91.3  | 77.6  | 68.3  | 67.4  |
| L-ARGININE   | (mg/kg) | 913      | 178.1 | 201.2 | 580   | 418.9 | 253.6 | 258.6 |
| L-GLUTAMINE  | (mg/kg) | 579.8    | 155.1 | 201.2 | 322.5 | 195.3 | 153.8 | 145   |
| L-METHIONINE | (mg/kg) | 8.1      | 1     | 0.7   | 1     | 1     | 0.3   | 0.1   |
| L-SERINE     | (mg/kg) | 109.1    | 51.4  | 50.8  | 69.9  | 57.8  | 46.8  | 48.7  |
| L-THREONINE  | (mg/kg) | 232.5    | 57.9  | 52.7  | 99.4  | 93.3  | 57.1  | 56.5  |
| L-TYROSINE   | (mg/kg) | 9.1      | 5.4   | 4.3   | 4.9   | 6     | 5.3   | 3.9   |

**Table S4.** Polyphenol amounts in grapes, must and wine.

|                                     |         | Substance | Vineyard |       |       |       |       |       |       |
|-------------------------------------|---------|-----------|----------|-------|-------|-------|-------|-------|-------|
|                                     |         |           | 1        | 2     | 3     | 4     | 5     | 6     | 7     |
| 4-Vinylphenol (mg/l)                |         | Wine      | 0.13     | 2.30  | 2.44  | 1.22  | 1.54  | 2.46  | 2.27  |
| 4-Vinyl Guaiacol (mg/l)             |         | Wine      | 1.55     | 5.11  | 6.91  | 8.61  | 7.22  | 6.99  | 7.65  |
| β-Phenylethyl (mg/l)                |         | Wine      | 13.30    | 23.40 | 24.10 | 16.50 | 22.10 | 21.10 | 22.90 |
| Rose oxide tot. (mg/l)              |         | Wine      | 0.008    | 0.005 | 0.010 | 0.011 | 0.010 | 0.010 | 0.007 |
| 3-Mercaptohexanol (mg/l)            |         | Wine      | 0.48     | 0.82  | 0.63  | 0.22  | 0.58  | 0.47  | 0.57  |
| Citronellol (free-form) (mg/l)      |         | Wine      | 0.08     | 0.05  | 0.08  | 0.13  | 0.12  | 0.11  | 0.10  |
| Citronellol (bound-form) (mg/l)     |         | Wine      | 0.03     | 0.04  | 0.04  | 0.03  | 0.02  | 0.04  | 0.03  |
| Citronellol tot (free+bound) (mg/l) |         | Grape     | 0.11     | 0.12  | 0.14  | 0.17  | 0.14  | 0.19  | 0.15  |
|                                     |         | Must      | 0.13     | 0.10  | 0.13  | 0.16  | 0.15  | 0.15  | 0.15  |
|                                     |         | Wine      | 0.11     | 0.09  | 0.12  | 0.16  | 0.14  | 0.15  | 0.13  |
| Geraniol (mg/l)                     |         | Grape     | 0.53     | 0.34  | 0.41  | 0.63  | 0.61  | 0.32  | 0.59  |
|                                     |         | Must      | 0.14     | 0.13  | 0.12  | 0.21  | 0.15  | 0.15  | 0.15  |
|                                     |         | Wine      | 0.60     | 0.21  | 0.40  | 1.50  | 1.10  | 0.57  | 0.60  |
|                                     | (mg/kg) | Grape     | 1609     | 3194  | 3296  | 1852  | 3969  | 3301  | 2278  |
| Polyphenols tot.                    | (mg/l)  | Must      | 94       | 196   | 221   | 206   | 196   | 205   | 206   |
|                                     |         | Wine      | 82       | 137   | 160   | 137   | 141   | 168   | 153   |

**Table S5.** Rubidium and Strontium in soils, grapes, musts and wines.

|           |       |       | Vineyard |        |        |       |       |        |        |
|-----------|-------|-------|----------|--------|--------|-------|-------|--------|--------|
|           |       |       | 1        | 2      | 3      | 4     | 5     | 6      | 7      |
| Rubidium  | mg/kg | Soil  | 61.50    | 34.50  | 44.27  | 19.98 | 51.10 | 30.17  | 41.80  |
|           | mg/kg | Grape | 1.88     | 0.78   | 0.71   | 0.92  | 0.91  | 0.55   | 0.58   |
|           | µg/l  | Must  | 1372     | 730    | 697    | 648   | 755   | 465    | 462    |
|           | µg/l  | Wine  | 1.16     | 0.60   | 0.63   | 0.56  | 0.67  | 0.42   | 0.43   |
| Strontium | mg/kg | Soil  | 116.65   | 128.33 | 105.67 | 75.93 | 89.58 | 194.67 | 345.67 |
|           | mg/kg | Grape | 0.40     | 0.40   | 0.20   | 0.70  | 0.40  | 0.60   | 0.80   |
|           | µg/l  | Must  | 108      | 127    | 72     | 151   | 134   | 152    | 189    |
|           | µg/l  | Wine  | 0.10     | 0.13   | 0.08   | 0.16  | 0.14  | 0.15   | 0.20   |
